# Urologia Internationalis

Official Organ of the International Continence Society

Founded by *Peter A. Narath* (1955–†1962) and *Heinrich Heusser* (1955–†1967)

Editor *G. Mayor*, Zürich

Co-Editor *Eric S. Glen*, Glasgow

Editorial Board

*C.E. Alken*, Homburg, Saar  
*J.J. Alvarez Ierena*,  
Mexico City  
*R. Andersen*, Oslo  
*J. Auvert*, Paris  
*A. Babics*, Budapest  
*P. Bischoff*, Hamburg  
*J. Bisquertt*, Santiago  
*E. Bors*, Cave Creek, Ariz.  
*P. Bruni*, Napoli  
*Th. Burghelle*, Bucharest  
*M. Caine*, Jerusalem  
*A. Carneiro de Moura*,  
Lisbon  
*J.C. Christoffersen*,  
Copenhagen  
*L. Cifuentes-Delatte*,  
Madrid  
*P.J. Dennehy*, Johannesburg  
*P. Deuticke*, Wien  
*R. de Freitas*, São Paulo

*G. Giertz*, Stockholm  
*S. Gil Vernet*, Barcelona  
*W.E. Goodwin*,  
Los Angeles, Calif.  
*W. Grégoir*, Bruxelles  
*H.G. Hanley*, London  
*F. Hinman*, San Francisco  
Calif.  
*F.A. Hughes*, Montevideo  
*A.R. Küss*, Paris  
*T. Kusunoki*, Osaka  
*W.F. Leadbetter*, Boston  
Mass.  
*E. Ljunggren*, Göteborg  
*L. Lopez*, Caracas  
*S.A. MacDonald*, Montreal  
*H. Marberger*, Innsbruck  
*R.I. Mathis*, Buenos Aires  
*E. Michalowski*, Kraków  
*J. Mombaerts*, Bruxelles

*H. Mortensen*, Melbourne  
*A. Oberholtzer*, Rome  
*V. Pačes*, Prague  
*E. Pérez-Castro*, Madrid  
*S. Petković*, Belgrade  
*A. Puigvert*, Barcelona  
*L.N. Pyrah*, Leeds  
*A. Pytel*, Moscow  
*G. Ravasini*, Padova  
*P.R. Riddle*, London  
*D.R. Smith*, San Francisco,  
Calif.  
*H. Takayasu*, Hongo  
*F. Tsuchiya*, Tokio  
*R. Uebelhör*, Wien  
*A. Villanueva*, Mexico City  
*W.F. Whitmore*  
New York, N.Y.  
*E. Wildbolz*, Bern  
*D.I. Williams*, London

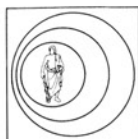



All rights reserved.

No part of this publication may be translated into other languages, reproduced or utilized in any form or by any means, electronic or mechanical, including photocopying, recording, microcopying, or by any information storage and retrieval system, without permission in writing from the publisher.

© Copyright 1978 by S. Karger AG, 4011 Basel (Switzerland), Arnold-Böcklin-Strasse 25  
Printed in Switzerland by Thür AG Offsetdruck, Pratteln



## Index

### No. 1–3

#### 6th Annual Meeting of the International Continence Society

Antwerp, September 2–4, 1976

|                                                                                                                                                                                                                                       |    |
|---------------------------------------------------------------------------------------------------------------------------------------------------------------------------------------------------------------------------------------|----|
| <i>Ulmsten, U.; Sjöberg, N.-O.; Andersson, K.-E.; Owman, C., and Walles, B.: A New Contribution to the Discussion of the Existence of a Urethral Sphincter Mechanism in the Female</i> . . . . .                                      | 3  |
| <i>Boyarsky, S. and Labay, P.: Principles of Bladder Function</i> . . . . .                                                                                                                                                           | 4  |
| <i>Mastrigt, R. van; Coolsaet, B.L.R.A., and Duyl, W.A. van: The Passive Properties of the Urinary Bladder in the Collection Phase</i> . . . . .                                                                                      | 14 |
| <i>Torrens, M.J.: Urethral Sphincteric Responses to Stimulation of the Sacral Nerves in the Human Female</i> . . . . .                                                                                                                | 22 |
| <i>Jonas, U. and Hohenfellner, R.: A New Concept of Urodynamic Evaluation of the Lower Urinary Tract</i> . . . . .                                                                                                                    | 27 |
| <i>Duyl, W.A. van; Coolsaet, B.L.R.A., and Mastrigt, R. van: A New Clinical Parameter for the Assessment of the Contractility of the Urinary Bladder</i> . . . . .                                                                    | 31 |
| <i>Andersen, J.T. and Bradley, W.E.: Urethral Pressure Profilometry. Assessment of Urethral Function by Combined Intravesical Pressure and EMG Recording</i> . . . .                                                                  | 40 |
| <i>Duyl, W.A. van; Zwart, A. van der; Rikken, H., and Roggeveen, H.: An Electronic Device for Quick Analysis of Exponential Decay Curves</i> . . . . .                                                                                | 50 |
| <i>Palmtag, H. and Heering, H.: Signs of Compensation and Decompensation in Bladder Outlet Obstruction</i> . . . . .                                                                                                                  | 53 |
| <i>Nordling, J.; Hebjørn, S.; Walter, S.; Hald, T., and Christiansen, H.D.: A Comparative Study of Water Cystometry and CO<sub>2</sub> Cystometry in 102 Consecutive Patients</i> . .                                                 | 60 |
| <i>Mortensen, S.; Djurhuus, J.C.; Frimodt-Møller, C., and Petersen, E.: The Diagnostic Value of Urethral Pressure Profiles, Cystometry, Pressure-Flow Studies and Micturition Cystourethrography in Female Incontinence</i> . . . . . | 68 |
| <i>Whitfield, H.N.; Perry, I.R., and Hill, D.W.: Computer Analysis of Detrusor Electromyograms</i> . . . . .                                                                                                                          | 74 |
| <i>Erlandson, B.E. and Fall, M.: Urethral Pressure Profile Studied by Two Different Microtip Transducers and an Open Catheter System</i> . . . . .                                                                                    | 79 |



|                                                                                                                                                                                                                                               |     |
|-----------------------------------------------------------------------------------------------------------------------------------------------------------------------------------------------------------------------------------------------|-----|
| <i>Heidler, H.; Kiesswetter, H., and Flamm, J.</i> : The Influence of Acid and Alkaline Media on Urodynamic Parameters . . . . .                                                                                                              | 83  |
| <i>Rollema, H.J.</i> : Ultrasonic Volumetry, a New Principle for Uroflowmetry; Comparison with the DISA Mictrometer . . . . .                                                                                                                 | 88  |
| <i>Turner Warwick, R.</i> : The Treatment of Female Urinary Incontinence . . . . .                                                                                                                                                            | 101 |
| <i>Öbrink, A.; Bunne, G., and Ingelman-Sundberg, A.</i> : The Urethral Pressure Profile in Urge Incontinence before and after Unilateral Blockade of the Inferior Hypogastric Plexus . . . . .                                                | 107 |
| <i>Henriksson, L.; Asmussen, M.; Löfgren, O., and Ulmsten, U.</i> : A Urodynamic Comparison between Abdominal Urethrocystopexy and Vaginal Sling Plasty in Female Stress Incontinence . . . . .                                               | 111 |
| <i>Faber, P.; Beck, L., and Heidenreich, J.</i> : Treatment of Urinary Stress Incontinence in Women with the Lyodura Sling . . . . .                                                                                                          | 117 |
| <i>Hebjørn, S. and Walter, S.</i> : Treatment of Female Incontinence with Emepronium Bromide. Detrusor Hyperreflexia in Multiple Sclerosis and Urge Incontinence in Postmenopausal Women, Treated with Emepronium Bromide (Cetiprin®) . . . . | 120 |
| <i>Michiels, H.G.E.; Delaere, K.P.J.; Debruyne, F.M.J., and Moonen, W.A.</i> : Treatment of Nonneurogenic Unstable Bladder by Prolonged Bladder Distension. A Review of 22 Cases . . . . .                                                    | 130 |
| <i>Walter, S.; Wolf, H.; Barlebo, H., and Kaalund Jensen, H.</i> : Urinary Incontinence in Postmenopausal Women Treated with Estrogens. A Double-Blind Clinical Trial . .                                                                     | 135 |
| <i>Walter, S.; Olesen, K.P.; Kaalund Jensen, H., and Hjortkær Pedersen, P.</i> : Urinary Stress Incontinence in Women. Pre- and Postoperative Evaluation . . . . .                                                                            | 144 |
| <i>Bologna, U.</i> : A New Surgical Procedure for the Correction of Urinary Stress Incontinence in the Female . . . . .                                                                                                                       | 150 |
| <i>Blandy, J.</i> : The Indications for Prostatectomy . . . . .                                                                                                                                                                               | 159 |
| <i>Abrams, P.H. and Feneley, R.C.L.</i> : The Significance of the Symptoms Associated with Bladder Outflow Obstruction . . . . .                                                                                                              | 171 |
| <i>Madersbacher, H.; Marberger, H., and Holl, P.</i> : Hydrodynamic Aspects of Bladder Neck Obstruction . . . . .                                                                                                                             | 175 |
| <i>Abrams, P.H.</i> : The Urodynamic Changes following Prostatectomy . . . . .                                                                                                                                                                | 181 |
| <i>Hohenfellner, R. and Jonas, U.</i> : Results following Prostatectomy . . . . .                                                                                                                                                             | 187 |
| <i>Andersen, J.T. and Nordling, J.</i> : Urinary Incontinence after Transvesical Prostatectomy .                                                                                                                                              | 191 |
| <i>Jonas, U. and Hohenfellner, R.</i> : Which Anatomical Structures in Fact Achieve Urinary Continence? . . . . .                                                                                                                             | 199 |

## No. 4

|                                                                                                                                                                                              |     |
|----------------------------------------------------------------------------------------------------------------------------------------------------------------------------------------------|-----|
| <i>Kraushaar, J. und Pfitzer, P.</i> : Zellkulturen als Vitalitätstest für gefrierkonservierte Nieren . . . . .                                                                              | 205 |
| <i>Bonanno, A.; Tonini, G.M., et Marinis, S., de</i> : Observations cliniques sur l'emploi d'un nouveau sel organique d'aluminium dans l'urémie en course de traitement dialytique . . . . . | 213 |
| <i>Patel, V.J.</i> : Tantalum als Röntgenkontrastmittel zur besseren Darstellung des Harnleiters bei der retrograden Pyelographie . . . . .                                                  | 222 |
| <i>Ueda, T. and Kano, M.</i> : Uretral Obstruction by Endometriosis . . . . .                                                                                                                | 227 |
| <i>Horpacsy, G.; May, G.; Zinsmeyer, J. und Mebel, M.</i> : Biochemische Parameter zur Feststellung der Lebensfähigkeit allogener Nierentransplantate . . . . .                              | 234 |



|                                                                                                                                                                                           |     |
|-------------------------------------------------------------------------------------------------------------------------------------------------------------------------------------------|-----|
| <i>Honoré, L.H.</i> : Postpubertal Untreated Cryptorchidism. Anatomical Relationship between Leydig Cells and Tubular Sclerosis . . . . .                                                 | 245 |
| <i>Leisering, W.; Ritter, H.; Battke, H.; Scheibner, K.; Schumann, E. und Endert, G.</i> : Bedeutung der Embolisierung der Arteria renalis für die Behandlung von Nierentumoren . . . . . | 252 |
| <i>Netto, N.R., jr.; Rangel, P.E.; Da Silva, R.P., and Lemos, G.C.</i> : Relation between the Vaginal Introital and Perianal Flora in Recurrent Cystitis in Women . . . . .               | 260 |
| <i>Patel, V.J.</i> : Myotrope Spasmyolyse in der Behandlung der Harnleiterkoliken . . . . .                                                                                               | 267 |
| Book Review . . . . .                                                                                                                                                                     | 275 |
| Varia . . . . .                                                                                                                                                                           | 276 |

## No. 5

### 7th Annual Meeting of the International Continence Society

Portoroz, 1977

|                                                                                                                                                                                                     |     |
|-----------------------------------------------------------------------------------------------------------------------------------------------------------------------------------------------------|-----|
| <i>Seiferth, J.; Heising, J., and Larkamp, H.</i> : Experiences and Critical Comments on the Temporary Intravesical Electrostimulation of the Neurogenic Bladder in Spina bifida Children . . . . . | 279 |
| <i>Palmtag, H.; Güllich, G., and Heering, H.</i> : Bladder Neck Hypertrophy and Wide Bladder Neck Anomaly (WBNA) . . . . .                                                                          | 285 |
| <i>van Gool, J.D.; Schmidt, R.A., and Tanagho, E.A.</i> : Development of Reflex Activity of Detrusor and Striated Sphincter Muscles in Experimental Paraplegia . . . . .                            | 293 |
| <i>Nordling, J.</i> : Alpha-Blockers and Urethral Pressure in Neurological Patients . . . . .                                                                                                       | 304 |
| <i>Heering, H.; Palmtag, H., and Paeslack, V.</i> : The Significance of Bladder Capacity under Aspect of Continence and Micturition in Neurogenic Bladder Dysfunction . . . . .                     | 310 |
| <i>Walter, S.</i> : Detrusor Hyperreflexia in Female Urinary Incontinence Treated Pharmacologically . . . . .                                                                                       | 316 |
| <i>Hindmarsh, J.R.; Essenhig, D.M., and Yeates, W.K.</i> : Indications for Bladder Transection . . . . .                                                                                            | 322 |
| <i>Borrelli, M. and Menezes de Goés, G.</i> : Bladder Training and Surgical Correction of Vesicoureteral Reflux: Useful Association . . . . .                                                       | 327 |
| <i>Kondo, A.; Mitsuya, H., and Torii, H.</i> : Computer Analysis of Micturition Parameters and Accuracy of Uroflowmeter . . . . .                                                                   | 337 |
| <i>Schmidt, R.A.; Witherow, R.; van Gool, J.D., and Tanagho, E.A.</i> : Urethral Pressure Profilometry with Membrane Catheter Compared with Perfusion Catheter Systems . . . . .                    | 345 |
| <i>Norlén, L.; Sundin, T., and Waagstein, F.</i> : Effect of $\beta$ -Adrenoceptor Stimulation on the Human Bladder <i>in vivo</i> . . . . .                                                        | 355 |
| <i>Nordling, J. and Christensen, B.</i> : Human Sympathetic Bladder Innervation. A Morphological Investigation . . . . .                                                                            | 359 |
| <i>Laval, K.-U.; Hannappel, J., and Lutzeyer, W.</i> : Effects of Beta-Adrenergic Stimulating and Blocking Agents on the Dynamics of the Human Bladder Outlet . . . . .                             | 366 |
| <i>Öbrink, A. and Bunne, G.</i> : Gracilis Interposition in Fistulas following Radiotherapy for Cervical Cancer. A Retrospective Study . . . . .                                                    | 370 |



## No. 6

|                                                                                                                                                                                                                    |     |
|--------------------------------------------------------------------------------------------------------------------------------------------------------------------------------------------------------------------|-----|
| <i>Öbrink, A. and Bunne, G.</i> : Urethrocystometric Findings in Urgency . . . . .                                                                                                                                 | 377 |
| <i>Bruijnes, E.</i> : The Ureteral Pressure Profile. An Experimental Study in Canine Ureters . . . . .                                                                                                             | 381 |
| <i>Prudente de Toledo, W.; Dias Montellato, N.I.; Arap, S.; Mitre, A.I.; Saldanha, L.B.,</i><br><i>and Menezes de Goês, G.</i> : Carcinoma in Diverticulum of Female Urethra . . . . .                             | 393 |
| <i>Constantinou, C.E.</i> : Contractility of the Pyeloureteral Pacemaker System . . . . .                                                                                                                          | 399 |
| <i>Ljunghall, S. and Hedstrand, H.</i> : Glucose Metabolism in Renal Stone Formers . . . . .                                                                                                                       | 417 |
| <i>Rao, M.S.; Bapna, B.C.; Sodhi, J.S.; Datta, B.N.; Reddy, M.J.; Rao, K.M.K., and</i><br><i>Vaidyanathan, S.</i> : Observations on the Value and Limitations of Infusion Pyelography in Anuric Patients . . . . . | 422 |
| <i>Kokotas, N.S.; Schmidt, R.A., and Tanagho, E.A.</i> : Axonal Transport of Horseradish Peroxidase. A New Method for Tracing Nervous Control of the Bladder . . . . .                                             | 427 |
| <i>Ueda, T. and Kamizaki, H.</i> : Clinical Study on Correlation with the 60-Min Plasma Phenolsulfonphthalein Concentration and Other Renal Function Tests . . . . .                                               | 435 |
| <i>Fall, M.; Erlandson, B.-E.; Carlsson, C.-A., and Sundin, T.</i> : Effects of Electrical Intravaginal Stimulation on Bladder Volume. An Experimental and Clinical Study . . . . .                                | 440 |
| Author Index . . . . .                                                                                                                                                                                             | 443 |
| Subject Index . . . . .                                                                                                                                                                                            | 444 |
